# Supplementary material
Source: HighWire-hosted journal article supplement (https://bmjopen.bmj.com/content/12/9/e063365)
Supplement: inline-supplementary-material-1 [file inline-supplementary-material-1.pdf]

## Describing and mapping scientific articles on alcohol globally for the period 2010–2021: A bibliometric analysis

### Supplementary files

#### Supplementary file 1: Search strategy

| Search string | <p><b>1. Web of Science query</b></p> <p>(AB=(harmful alcohol) OR TI=(harmful alcohol) OR AB=(alcohol control) OR TI=(alcohol control) OR AB=(alcohol consumption) OR TI=(alcohol consumption) OR AB=(alcohol use) OR TI=(alcohol use) OR AB=(alcohol policy) OR TI=(alcohol policy) OR AB=(alcohol harm) OR TI=(alcohol harm)) AND (AB=(harm) OR TI=(harm) OR AB=(burden) OR TI=(burden) OR AB=(alcohol policy) OR TI=(alcohol policy) OR AB=(alcohol regulation) OR TI=(alcohol regulation) OR AB=(alcohol marketing) OR TI=(alcohol marketing) OR AB=(alcohol industry) OR TI=(alcohol industry) OR AB=(licensing) OR TI=(licensing) OR AB=(taxes) OR TI=(taxes) OR AB=(pricing) OR TI=(pricing)) AND TI=(alcohol) NOT (TI=(rat) OR AB=(rat) OR TI=(mice) OR AB=(mice) OR TI=(brain) OR AB=(brain) OR TI=(prenatal) OR AB=(prenatal) OR TI=(fetal) OR AB=(fetal) OR TI=(suicide) OR AB=(suicide) OR TI=(liver) OR AB=(liver) OR TI=(chemistry) OR AB=(chemistry) OR TI=(polyvinyl) OR AB=(polyvinyl) OR TI=(Synthesis) OR AB=(Synthesis) OR TI=(gene) OR AB=(gene) OR TI=(fermentation) OR AB=(fermentation) OR TI=(trial) OR AB=(trial) OR TI=(disorders) OR AB=(disorders) OR TI=(addiction) OR AB=(addiction) OR TI=(depression) OR AB=(depression) OR TI=(anxiety) OR AB=(anxiety) OR TI=(Motive) OR AB=(Motive) OR TI=(bio*) OR AB=(bio*) OR TI=(gels) OR AB=(gels) OR TI=(fuel) OR AB=(fuel) OR TI=(algae) OR AB=(algae))</p> <p><b>2. PubMed query</b></p> <p>("alcohol"[Title]) AND ("harmful alcohol"[Title/Abstract] OR "alcohol control"[Title/Abstract] OR "alcohol consumption"[Title/Abstract] OR "alcohol use"[Title/Abstract] OR "alcohol policy"[Title] OR "alcohol harm"[Title]) AND ("harm"[Title/Abstract] OR "burden"[Title/Abstract] OR "alcohol policy"[Title/Abstract] OR "alcohol regulation"[Title/Abstract] OR "alcohol marketing"[Title/Abstract] OR "alcohol industry"[Title/Abstract] OR "licensing"[Title/Abstract] OR "taxes"[Title/Abstract] OR "pricing"[Title/Abstract]) NOT ("rat"[Title/Abstract] OR "mice"[Title/Abstract] OR "brain"[Title/Abstract] OR "prenatal"[Title/Abstract] OR "fetal"[Title/Abstract] OR "suicide"[Title/Abstract] OR "liver"[Title/Abstract] OR "chemistry"[Title/Abstract] OR "polyvinyl"[Title/Abstract] OR "synthesis"[Title/Abstract] OR "gene"[Title/Abstract] OR "fermentation"[Title/Abstract] OR "trial"[Title/Abstract] OR "disorders"[Title/Abstract] OR "addiction"[Title/Abstract] OR</p> |
|---------------|--------------------------------------------------------------------------------------------------------------------------------------------------------------------------------------------------------------------------------------------------------------------------------------------------------------------------------------------------------------------------------------------------------------------------------------------------------------------------------------------------------------------------------------------------------------------------------------------------------------------------------------------------------------------------------------------------------------------------------------------------------------------------------------------------------------------------------------------------------------------------------------------------------------------------------------------------------------------------------------------------------------------------------------------------------------------------------------------------------------------------------------------------------------------------------------------------------------------------------------------------------------------------------------------------------------------------------------------------------------------------------------------------------------------------------------------------------------------------------------------------------------------------------------------------------------------------------------------------------------------------------------------------------------------------------------------------------------------------------------------------------------------------------------------------------------------------------------------------------------------------------------------------------------------------------------------------------------------------------------------------------------------------------------------------------------------------------------------------------------------------------------------------------------------------------------------------------------------------------------------------------------------------------------------------------------------------------------------------------------------------------------------------------------------------------------------------------------------------|
|---------------|--------------------------------------------------------------------------------------------------------------------------------------------------------------------------------------------------------------------------------------------------------------------------------------------------------------------------------------------------------------------------------------------------------------------------------------------------------------------------------------------------------------------------------------------------------------------------------------------------------------------------------------------------------------------------------------------------------------------------------------------------------------------------------------------------------------------------------------------------------------------------------------------------------------------------------------------------------------------------------------------------------------------------------------------------------------------------------------------------------------------------------------------------------------------------------------------------------------------------------------------------------------------------------------------------------------------------------------------------------------------------------------------------------------------------------------------------------------------------------------------------------------------------------------------------------------------------------------------------------------------------------------------------------------------------------------------------------------------------------------------------------------------------------------------------------------------------------------------------------------------------------------------------------------------------------------------------------------------------------------------------------------------------------------------------------------------------------------------------------------------------------------------------------------------------------------------------------------------------------------------------------------------------------------------------------------------------------------------------------------------------------------------------------------------------------------------------------------------------|

|                                            |                                                                                                                                                                                                                                                                                                                                                                                                                                                                                                                                                            |                                                                        |                                                                                           |
|--------------------------------------------|------------------------------------------------------------------------------------------------------------------------------------------------------------------------------------------------------------------------------------------------------------------------------------------------------------------------------------------------------------------------------------------------------------------------------------------------------------------------------------------------------------------------------------------------------------|------------------------------------------------------------------------|-------------------------------------------------------------------------------------------|
|                                            | "depression"[Title/Abstract] OR "anxiety"[Title/Abstract] OR<br>"Motive"[Title/Abstract] OR "bio*"[Title/Abstract] OR<br>"gels"[Title/Abstract] OR "fuel"[Title/Abstract] OR "algae"[Title/Abstract])<br>AND (2010:2021[pdat])                                                                                                                                                                                                                                                                                                                             |                                                                        |                                                                                           |
| <b>Database</b>                            | <ul style="list-style-type: none"> <li>PubMed</li> <li>Web of Science</li> </ul>                                                                                                                                                                                                                                                                                                                                                                                                                                                                           |                                                                        |                                                                                           |
| <b>Search limits</b>                       | <ul style="list-style-type: none"> <li>Publication date: 1 January 2010 to 31 December 2021</li> </ul>                                                                                                                                                                                                                                                                                                                                                                                                                                                     |                                                                        |                                                                                           |
| <b>Inclusion criteria</b>                  | <ul style="list-style-type: none"> <li>Indexed scientific article: <ol style="list-style-type: none"> <li>Topic of article related to alcohol consumption, its determinants, harms, governance and control policies as per the keyword search of title/abstract of the article AND</li> <li>Publication date in timeframe specified.</li> </ol> </li> </ul>                                                                                                                                                                                                |                                                                        |                                                                                           |
| <b>Exclusion criteria</b>                  | <ul style="list-style-type: none"> <li>Articles missing publication year</li> <li>Articles outside of timeframe</li> <li>Articles containing the following keywords in the title/abstract: rat, mice, brain, prenatal, foetal, suicide, liver, chemistry, polyvinyl, synthesis, gene, fermentation, trial, disorders, addiction, depression, anxiety, motive, Gels, fuel, algae, bio*</li> </ul>                                                                                                                                                           |                                                                        |                                                                                           |
| <b>Variables for data collection</b>       | <p><b>Extracted data</b></p> <ul style="list-style-type: none"> <li>Article title</li> <li>Author name</li> <li>Journal Name</li> <li>Article Type</li> <li>Publication Year</li> <li>Keywords</li> <li>Abstract</li> <li>Author affiliations (organisation)</li> <li>DOI</li> <li>Grant Organisation</li> <li>Citation count</li> </ul> <p><b>Derived features</b></p> <ul style="list-style-type: none"> <li>Country of author's affiliation and related income group</li> <li>Article's country of study (where applicable) and income group</li> </ul> |                                                                        |                                                                                           |
| <b>Techniques and metrics for analysis</b> | <b>Technique</b>                                                                                                                                                                                                                                                                                                                                                                                                                                                                                                                                           | <b>Metrics</b>                                                         | <b>Source and approach to analysis</b>                                                    |
|                                            | Performance analysis                                                                                                                                                                                                                                                                                                                                                                                                                                                                                                                                       | Publication output (sole-authored/co-authored publications, citations) | Bibliometric data; descriptive statistics                                                 |
|                                            | <i>Publication/production-related</i>                                                                                                                                                                                                                                                                                                                                                                                                                                                                                                                      | Author affiliation and country of affiliation                          | Bibliometric data; descriptive statistics and categorisation of countries by income group |

|  |                                                    |                             |                                                                                                                                                    |
|--|----------------------------------------------------|-----------------------------|----------------------------------------------------------------------------------------------------------------------------------------------------|
|  |                                                    | Funding sources             | Bibliometric data; descriptive statistics and categorisation by type of funder                                                                     |
|  | Science mapping<br><i>Subject/contents-related</i> | Country and region of study | Keyword search; categorisation by income group                                                                                                     |
|  |                                                    | Research themes             | Deductive analysis using keyword search by five research themes (determinants, consumption, governance, policy response, and alcohol-related harm) |

### Supplementary file 2: Testing of searches

The effect that the inclusion of other databases could have was tested with a preliminary set of keywords for the database SciELO. The analysed search resulted in 6,417 unique results in PubMed and Web of Science. The corresponding search in SciELO resulted in 81 unique results. Out of these 81 articles, 54 articles (67%) were already included in the database. Thus, for that query, only 27 articles would have been added by including SciELO, increasing the size of the dataset by less than 0.5%. This would have meant an additional average of 2.25 articles per year, for a dataset with an average of more than 500 articles per year.

**Fig. 2.1.** Number of articles added if SciELO was included

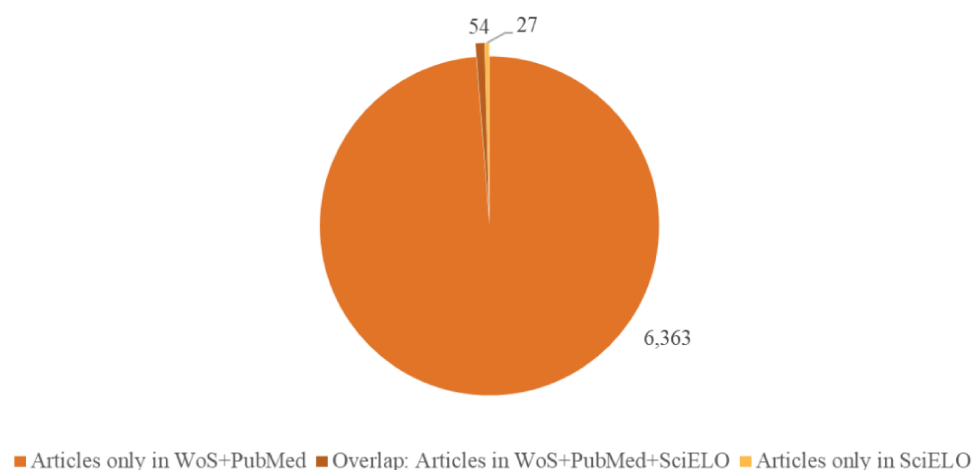

Note: This analysis was carried out with a preliminary set of keywords. Total of 6,417 articles in the Web of Science + PubMed dataset. Overlap between SciELO and Web of Science + PubMed: 54 articles. Articles only in SciELO: 27.

**Supplementary file 3: Publications for search strategy quality checks**

1. Rossow, I., & Mäkelä, P. (2021). Public Health Thinking Around Alcohol-Related Harm: Why Does Per Capita Consumption Matter?. *Journal of studies on alcohol and drugs*, 82(1), 9–17.
2. Peake, L., van Schalkwyk, M., Maani, N., & Petticrew, M. (2021). Analysis of the accuracy and completeness of cardiovascular health information on alcohol industry-funded websites. *European journal of public health*, ckab135. Advance online publication. <https://doi.org/10.1093/eurpub/ckab135>
3. Odeigah, O. W., Dumbili, E. W., Patton, R., & Olley, B. O. (2021). Alcohol Labeling Regulations and Industry Compliance in Nigeria: Evidence to Guide Policy Implementation. *Journal of studies on alcohol and drugs*, 82(1), 60–65.
4. Trangenstein, P. J., Sadler, R., Morrison, C. N., & Jernigan, D. H. (2021). Looking Back and Moving Forward: The Evolution and Potential Opportunities for the Future of Alcohol Outlet Density Measurement. *Addiction research & theory*, 29(2), 117–128. <https://doi.org/10.1080/16066359.2020.1751128>
5. Trangenstein, P. J., & Jernigan, D. H. (2020). The Health Impact of Alcohol on American Cities: Modeling the Local Burden of Current Alcohol Use in One Jurisdiction. *Journal of urban health : bulletin of the New York Academy of Medicine*, 97(2), 260–270. <https://doi.org/10.1007/s11524-019-00403-y>
6. Bray, J., & Babor, T. F. (2018). An Alcohol Policy Trifecta: Reduce Alcohol Problems, Save on Health Care, Generate Public Revenues. *Journal of studies on alcohol and drugs*, 79(1), 5–6.
7. Ferreira-Borges, C., Parry, C. D., & Babor, T. F. (2017). Harmful Use of Alcohol: A Shadow over Sub-Saharan Africa in Need of Workable Solutions. *International journal of environmental research and public health*, 14(4), 346. <https://doi.org/10.3390/ijerph14040346>
8. Babor, T. F., Jernigan, D., Brookes, C., & Brown, K. (2017). Toward a public health approach to the protection of vulnerable populations from the harmful effects of alcohol marketing. *Addiction (Abingdon, England)*, 112 Suppl 1, 125–127. <https://doi.org/10.1111/add.13682>
9. Ferreira-Borges, C., Dias, S., Babor, T., Esser, M. B., & Parry, C. D. (2015). Alcohol and public health in Africa: can we prevent alcohol-related harm from increasing?. *Addiction (Abingdon, England)*, 110(9), 1373–1379. <https://doi.org/10.1111/add.12916>
10. Berdzuli, N., Ferreira-Borges, C., Gual, A., & Rehm, J. (2020). Alcohol Control Policy in Europe: Overview and Exemplary Countries. *International journal of environmental research and public health*, 17(21), 8162. <https://doi.org/10.3390/ijerph17218162>
11. Manthey, J., Probst, C., Kilian, C., Moskalewicz, J., Sierosławski, J., Karlsson, T., & Rehm, J. (2020). Unrecorded Alcohol Consumption in Seven European Union Countries. *European addiction research*, 26(6), 316–325. <https://doi.org/10.1159/000506333>
12. Casswell S. (2019). Will alcohol harm get the global response it deserves?. *Lancet (London, England)*, 394(10207), 1396–1397. [https://doi.org/10.1016/S0140-6736\(19\)31883-5](https://doi.org/10.1016/S0140-6736(19)31883-5)
13. Rehm, J., Babor, T. F., Casswell, S., & Room, R. (2021). Heterogeneity in trends of alcohol use around the world: Do policies make a difference?. *Drug and alcohol review*, 40(3), 345–349. <https://doi.org/10.1111/dar.13248>
14. Rehm, J., Štelemėkas, M., Ferreira-Borges, C., Jiang, H., Lange, S., Neufeld, M., Room, R., Casswell, S., Tran, A., & Manthey, J. (2021). Classifying Alcohol Control Policies with Respect to Expected Changes in Consumption and Alcohol-Attributable Harm: The Example of Lithuania, 2000–2019. *International journal of environmental research and public health*, 18(5), 2419. <https://doi.org/10.3390/ijerph18052419>

**Supplementary file 4: Main categories and keywords of research themes**

| Category             | Keywords                                                                                                                                                                                                                                                                                                                                                                                                                                                                                                                                                                                                                                                                                                                                                                                                                                                                                                                                                                                                                       |
|----------------------|--------------------------------------------------------------------------------------------------------------------------------------------------------------------------------------------------------------------------------------------------------------------------------------------------------------------------------------------------------------------------------------------------------------------------------------------------------------------------------------------------------------------------------------------------------------------------------------------------------------------------------------------------------------------------------------------------------------------------------------------------------------------------------------------------------------------------------------------------------------------------------------------------------------------------------------------------------------------------------------------------------------------------------|
| Determinants         | commercial, industry, interference, conflict, conflicts, self-regulation, self-regulation, corporate social responsibility, incentives, socioeconomic, social, cultural, behavioral, behavioural, industries, contexts, context, gender, conflict of interest, interest, interests, self-regulation, voluntary, illicit production, unrecorded, incentives, illicit, illegal, unregistered, unrecorded, home-made, homemade, homebrew, smuggled, surrogate                                                                                                                                                                                                                                                                                                                                                                                                                                                                                                                                                                     |
| Consumption          | consumption, use, abstinence, binge drinking, binge-drinking, misuse, disease, mortality, burden, excessive, intoxication, death, population, standard drink                                                                                                                                                                                                                                                                                                                                                                                                                                                                                                                                                                                                                                                                                                                                                                                                                                                                   |
| Governance           | national policy, policy, policies, implementation, guidelines, legislation, legal definition, ban, law, survey, monitor, trends, monitoring, surveillance, evaluation, M&E, regulation                                                                                                                                                                                                                                                                                                                                                                                                                                                                                                                                                                                                                                                                                                                                                                                                                                         |
| Policy response      | treatment, care, delivery, prevention, emergency department, hospital, primary care , communities, awareness, community, workplace, school, setting, environment, public space, public place, blood alcohol, penalties, sobriety, offense, driving licence , driver's licence, drink-driving, drink driving, drunk driving, drivers, driving, car, bike, age limit, on-premise, off-premise, minimum age, licensing, outlet, outlets, retail, sales, hours , retail, pubs, bar, monopolies, distribution, availability, license, monopoly, monopolies, distribution, advertisement, advertising, advertisement restrictions, product placement, sponsorship, marketing, promotion, marketing policy, media, social media, Sales, promotion, brand, placements, sponsorship, price measures, pricing, price, inflation, price incentive, price policies, buy , prices, tax, taxes, taxation, duty, value-added, vat, label, labels, labelling, warning, information, brief intervention, vehicle, vehicles, campaigns, warnings |
| Alcohol-related harm | violence, unemployment, absenteeism, suicide, children, child, family, stigmatisation, economic burden, economic cost, adolescent, harm, risk, FASD, FAS, fatalities, consequences, aggression, injury, injuries, effect, effects, cognitive, poverty, homicide, road traffic injury                                                                                                                                                                                                                                                                                                                                                                                                                                                                                                                                                                                                                                                                                                                                           |

**Supplementary file 5: Policy response subcategories and keywords**

| <b>Subcategory</b>            | <b>Keywords</b>                                                                                                                                                                                                                                    |
|-------------------------------|----------------------------------------------------------------------------------------------------------------------------------------------------------------------------------------------------------------------------------------------------|
| Health service response       | treatment, care, delivery, prevention, emergency department, hospital, primary care, brief intervention                                                                                                                                            |
| Community action and settings | communities, community, workplace, school, setting, environment, public space, public place, awareness, information, campaigns                                                                                                                     |
| Drink driving                 | blood alcohol, penalties, sobriety, offense, driving licence, driver's licence, drink-driving, drink driving, drunk driving, drivers, driving, vehicle, car, bike, vehicles                                                                        |
| Availability                  | age limit, on-premises, off-premise, minimum age, licensing, outlet, outlets, retail, sales, hours, retail, pubs, bar, monopolies, distribution, availability, license, monopoly, monopolies, distribution                                         |
| Marketing and labelling       | advertisement, advertising, advertisement restrictions, product placement, sponsorship, marketing, promotion, marketing policy, media, social media, Sales, promotion, brand, placements, sponsorship, label, labels, labelling, warning, warnings |
| Tax and price policies        | price measures, pricing, price, inflation, price incentive, price policies, buy, prices, tax, taxes, taxation, duty, value-added, vat                                                                                                              |
